# Supplementary material for: Mars–van-Krevelen mechanism-based blackening of nano-sized white semiconducting oxides for synergetic solar photo-thermocatalytic degradation of dye pollutants
Source: Royal Society of Chemistry journal article supplement (doi:10.1039/c9nr09534a), 2020-01-01
Supplement: c9nr09534a1.pdf [file c9nr09534a1.pdf]

## Supporting information

### Mars-van-Krevelen mechanism-based blackening of nano-sized white semiconducting oxides for synergetic solar photo-thermocatalytic degradation of dye pollutants

Haoming Bao <sup>‡a</sup>, Shuyi Zhu <sup>‡a, b</sup>, Le Zhou <sup>a, b</sup>, Hao Fu <sup>a, b</sup>, Hongwen Zhang <sup>\*a</sup> and Weiping Cai <sup>\*a, b</sup>

<sup>a</sup>*Key Lab of Materials Physics, Anhui Key Lab of Nanomaterials and Nanotechnology, Institute of Solid State Physics, Chinese Academy of Sciences, Hefei 230031, P.R. China*

<sup>b</sup>*University of Science and Technology of China, Hefei 230026, PR China*

#### 1. Computational details

The computational calculations were performed within DFT method. The general gradient approximation (GGA) with Perdew-Burke-Ernzerhoff (PBE) functional and ultrasoft pseudo-potentials were used to describe the exchange correlation effects and electron-ion interactions, respectively, with kinetic energy cutoffs of 340.0 eV. The k-points were set to  $4 \times 4 \times 1$ , Structure optimization was performed by minimizing the total energy and the ionic force, until all the components of the residual forces were less than 0.03 eV/Å. The energy and the displacement tolerances were set to  $1.0 \times 10^{-5}$  eV/atom, and  $1.0 \times 10^{-3}$  Å, respectively. All the calculations have been performed in CASTEP codes.

The optimized bulk lattice parameters were  $a=3.78904$  Å,  $b=3.78904$  Å,  $c=8.3475$  Å. The (001) surface were modeled by vacuum slabs with a thickness of 15 Å and the number of the atom layers is 4.

#### 2 Synthesis of the ZnO nanocrystal powder

The synthesis of nano sized ZnO nanocrystal was prepared by direct precipitation method, according to a previous work <sup>S1</sup>.

In details, firstly, 50 mL of Zn(NO<sub>3</sub>)<sub>2</sub> aqueous solution with concentration of 1 wt% was

added into 50 mL of NaOH aqueous solution with concentration of 1.5 wt%. Afterwards, white  $\text{Zn(OH)}_2$  precipitate was formed. After 3 times of centrifugation (5 min, 800 rpm) for collection and cleaning, the  $\text{Zn(OH)}_2$  precipitate was dried at 80 °C for 1 h, forming  $\text{Zn(OH)}_2$  powder. Then the  $\text{Zn(OH)}_2$  powder was annealed at 300 °C for 2.5 h. After that the ZnO powder was thus prepared.

### **3 Synthesis of the $\text{SnO}_2$ nanocrystal powder**

The synthesis of nano sized  $\text{SnO}_2$  nanocrystal was also prepared by direct precipitation method, according to a previous work <sup>S2</sup>.

In details, firstly, 50 mL ammonia aqueous solution (1 M) was added directly to 50 mL  $\text{SnCl}_4$  aqueous solution (0.2 M) to form white  $\text{Sn(OH)}_4$  precipitate. The  $\text{Sn(OH)}_4$  precipitate was collected by 3 times of centrifugation (5 min, 800 rpm). The precipitates were then dried at 80 °C for 1 h. The dried precipitates were annealed at 300 °C in the air for 2.5 h, forming the  $\text{SnO}_2$  powder.

### **Reference**

S1 J. R. Huffman and B. F. Dodge, *Ind. Eng. Chem.*, 1929, **21**, 1056-1061.

S2 K. C. Song and Y. Kang, *Mater. Lett.*, 2000, **42**, 283-289.

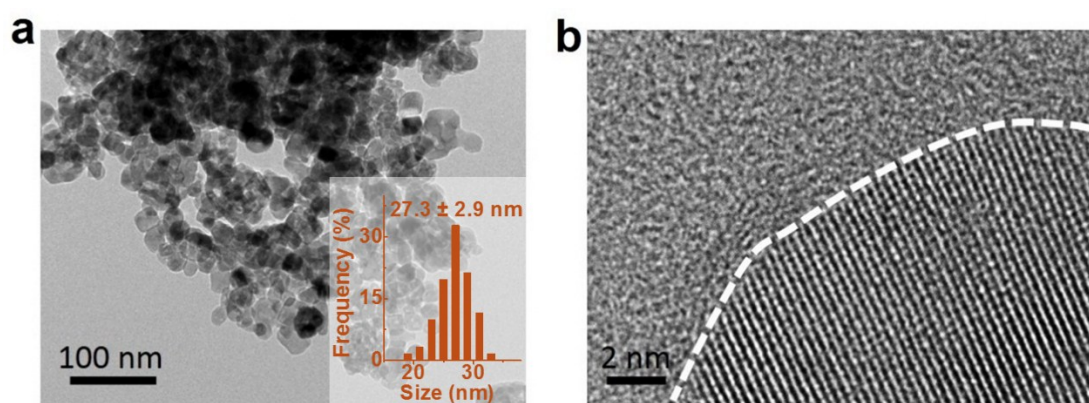

**Fig. S1** (a) The low magnification of TEM image of the pristine TiO<sub>2</sub> nanocrystals. (b) The HRTEM image of the pristine TiO<sub>2</sub> nanocrystals.

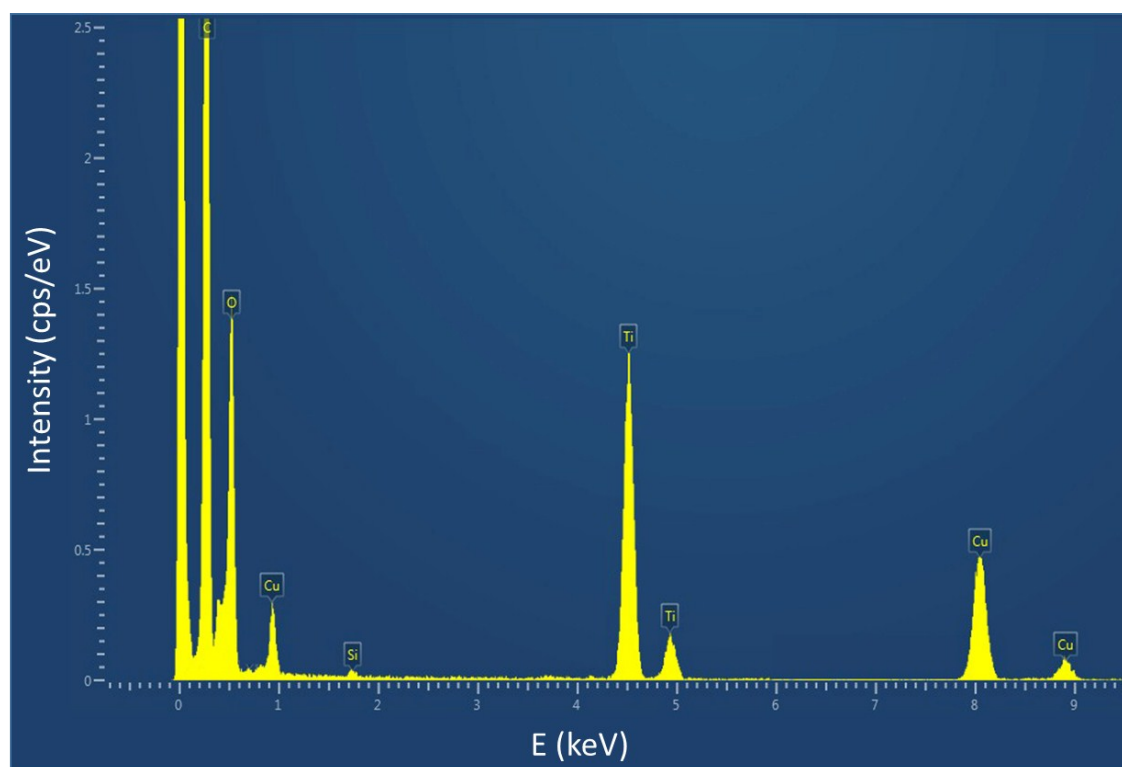

**Fig. S2** The EDS spectrum of the B-TiO<sub>2</sub> corresponding to Fig. 2b.

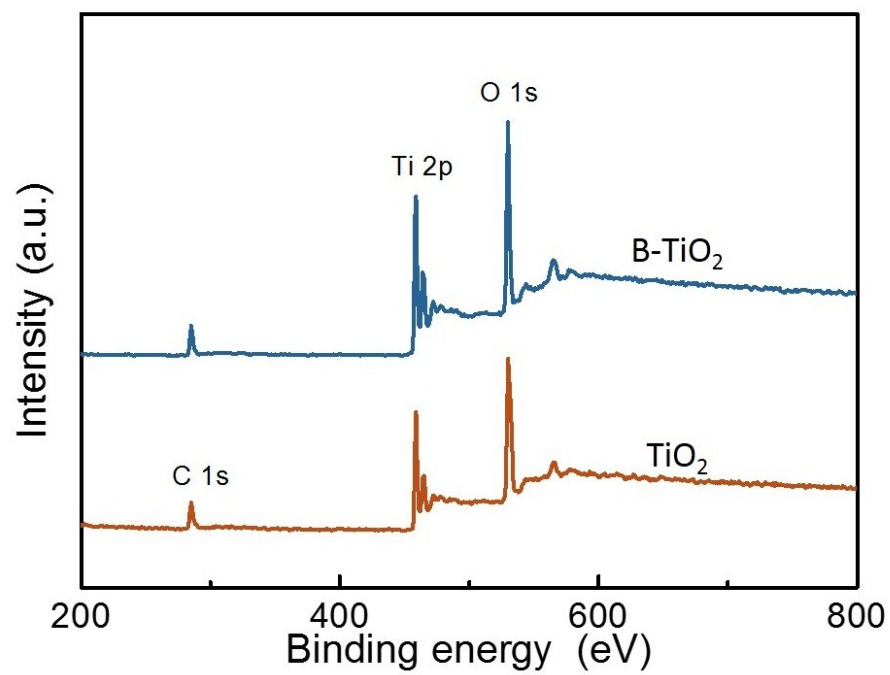

**Fig. S3** The XPS full survey spectra of the pristine TiO<sub>2</sub> and the B-TiO<sub>2</sub> powders.

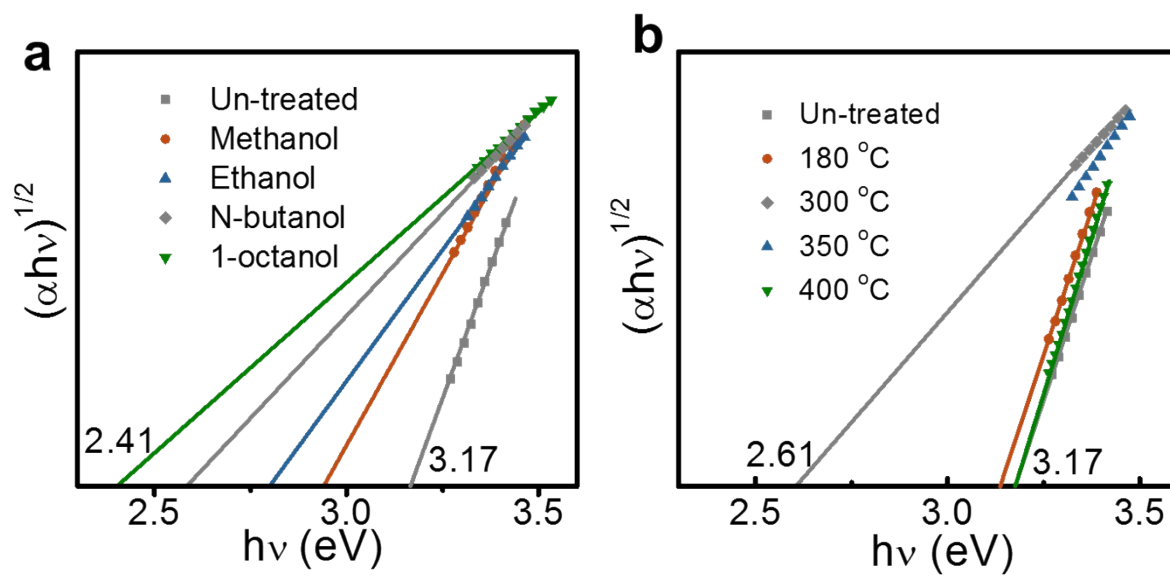

**Fig. S4** The plots of photon energy ( $h\nu$ ) versus the  $(\alpha h\nu)^{1/2}$  corresponding to the data in Fig. 3.

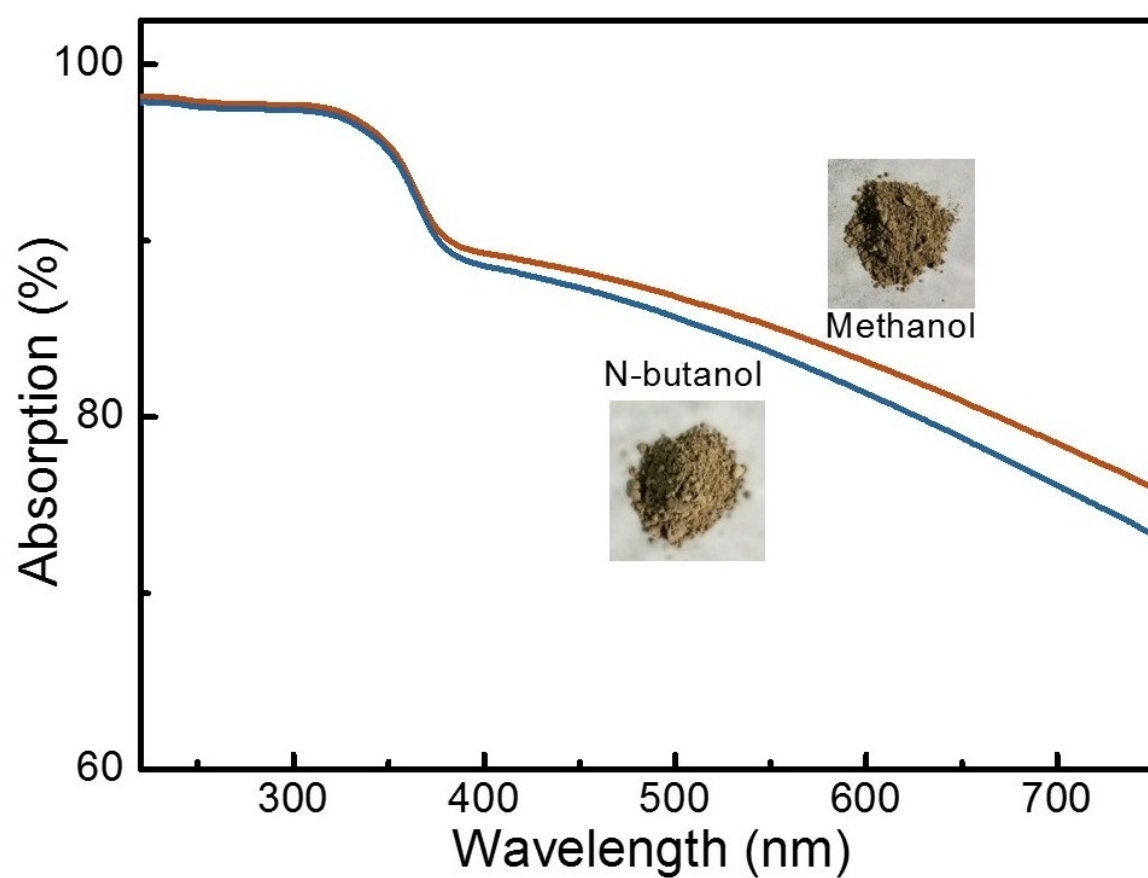

**Fig. S5** The optical absorption spectra of the B-TiO<sub>2</sub> powders obtained with argon-loaded methanol and N-butanol vapor flow. The insets are the photos of the corresponding B-TiO<sub>2</sub> powders.

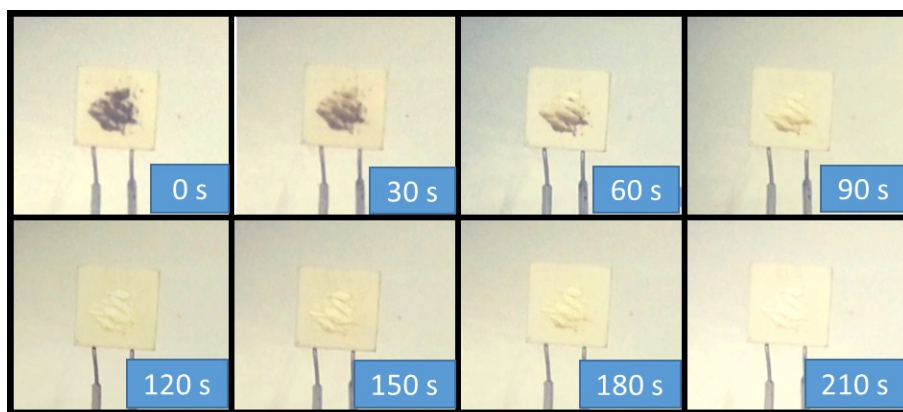

**Fig. S6** The pictures of color evolution of B-TiO<sub>2</sub> during heating at 400 °C.
